# Supplementary material
Source: publisher figshare collection journal article supplement (https://gsajournals.figshare.com/ndownloader/files/19071944)
Supplement: Supplementary file 1 [file 19071944]

## Sheet: Raw data
Sample Name	Target Name	Cт	Cт Mean	Cт SD
WT Larva 1	ADHprox (4520/4449)	20.1387	20.2935	0.173164
WT Larva 1	ADHprox (4520/4449)	20.2612
WT Larva 1	ADHprox (4520/4449)	20.4805
WT Larva 1	ADHdist Specific (4333/4449)		33.8508	0.237004
WT Larva 1	ADHdist Specific (4333/4449)	33.6833
WT Larva 1	ADHdist Specific (4333/4449)	34.0184
WT Larva 1	aTUB84B (4619/4620)	22.4228	22.3607	0.0878974
WT Larva 1	aTUB84B (4619/4620)	22.2985
WT Larva 1	aTUB84B (4619/4620)
WT Larva 2	ADHprox (4520/4449)	20.4743	20.487	0.0215961
WT Larva 2	ADHprox (4520/4449)	20.5119
WT Larva 2	ADHprox (4520/4449)	20.4748
WT Larva 2	ADHdist Specific (4333/4449)	33.7516	33.8338	0.084921
WT Larva 2	ADHdist Specific (4333/4449)	33.8286
WT Larva 2	ADHdist Specific (4333/4449)	33.9212
WT Larva 2	aTUB84B (4619/4620)	22.5276	22.4433	0.119253
WT Larva 2	aTUB84B (4619/4620)
WT Larva 2	aTUB84B (4619/4620)	22.359
WT Adult 1	ADHprox (4520/4449)	24.4455	24.4026	0.0606146
WT Adult 1	ADHprox (4520/4449)	24.3598
WT Adult 1	ADHprox (4520/4449)
WT Adult 1	ADHdist Specific (4333/4449)	20.5834	20.571	0.0175196
WT Adult 1	ADHdist Specific (4333/4449)	20.5586
WT Adult 1	ADHdist Specific (4333/4449)
WT Adult 1	aTUB84B (4619/4620)	22.2484	22.0884	0.165374
WT Adult 1	aTUB84B (4619/4620)	22.0985
WT Adult 1	aTUB84B (4619/4620)	21.9181
WT Adult 2	ADHprox (4520/4449)	24.6003	24.599	0.00193403
WT Adult 2	ADHprox (4520/4449)	24.5976
WT Adult 2	ADHprox (4520/4449)
WT Adult 2	ADHdist Specific (4333/4449)	20.7735	20.6696	0.0901076
WT Adult 2	ADHdist Specific (4333/4449)	20.6127
WT Adult 2	ADHdist Specific (4333/4449)	20.6225
WT Adult 2	aTUB84B (4619/4620)	22.3666	22.3481	0.166168
WT Adult 2	aTUB84B (4619/4620)	22.5043
WT Adult 2	aTUB84B (4619/4620)	22.1735

## Sheet: Analysis
WT Larva 1
	CT Mean	∆CT	2^-∆CT
ADHprox	20.2935	-2.06717	4.19063
ADHdist	33.8508	11.4902	0.000347625
aTUB84B	22.3607	0	1
WT Larva 2
	CT Mean	∆CT	2^-∆CT
ADHprox	20.487	-1.95629	3.88064
ADHdist	33.8338	11.3905	0.000372488
aTUB84B	22.4433	0	1
WT Adult 1
	CT Mean	∆CT	2^-∆CT
ADHprox	24.4026	2.31428	0.201062
ADHdist	20.571	-1.51734	2.86263
aTUB84B	22.0884	0	1
WT Adult 2
	CT Mean	∆CT	2^-∆CT
ADHprox	24.599	2.25082	0.210105
ADHdist	20.6696	-1.67857	3.2011
aTUB84B	22.3481	0	1
